# Supplementary material for: Antibiotic-resistant bacteria disinfection in untreated hospital wastewater using peracetic acid with short contact time
Source: Royal Society of Chemistry journal article supplement (doi:10.1039/d2ew00403h), 2022-01-01
Supplement: d2ew00403h1.pdf [file d2ew00403h1.pdf]

## *Supporting information*

### **Antibiotic-resistant bacteria disinfection in untreated hospitals wastewater using peracetic acid with short contact time**

Diego Francisco Sanchez<sup>a</sup>, Lina Kisieline<sup>a</sup>, Sabine Lindholst<sup>b</sup>, Alexander Valentin Hansen<sup>c</sup>, Jesper Sanderbo<sup>c</sup>, Birgitte Krogh Løppenthien<sup>c</sup>, Thomas Eilkær<sup>c</sup>, Natascha Kock Pedersen<sup>d</sup>, Jan Jørgensen<sup>d</sup>, Caroline Kragelund<sup>b</sup>, Henrik Rasmus Andersen<sup>a</sup>, Ravi Kumar Chhetri<sup>\*a</sup>

<sup>a</sup>Department of Environmental and Resource Engineering, Technical University of Denmark, Bygningstorvet, Building 115, 2800 Kgs. Lyngby, Denmark.

<sup>b</sup>Department of Water and Biotechnology, Danish Technological Institute, Kongsvang Alle 29, DK-8000 Aarhus C, Denmark.

<sup>c</sup>Alumichem (Norlex Systems A/S), Bistrupvej 172, 3460 Birkerød.

<sup>d</sup>SK Forsyning, Nordvej 7, 4200 Slagelse.

\*Corresponding author: [rakc@env.dtu.dk](mailto:rakc@env.dtu.dk)

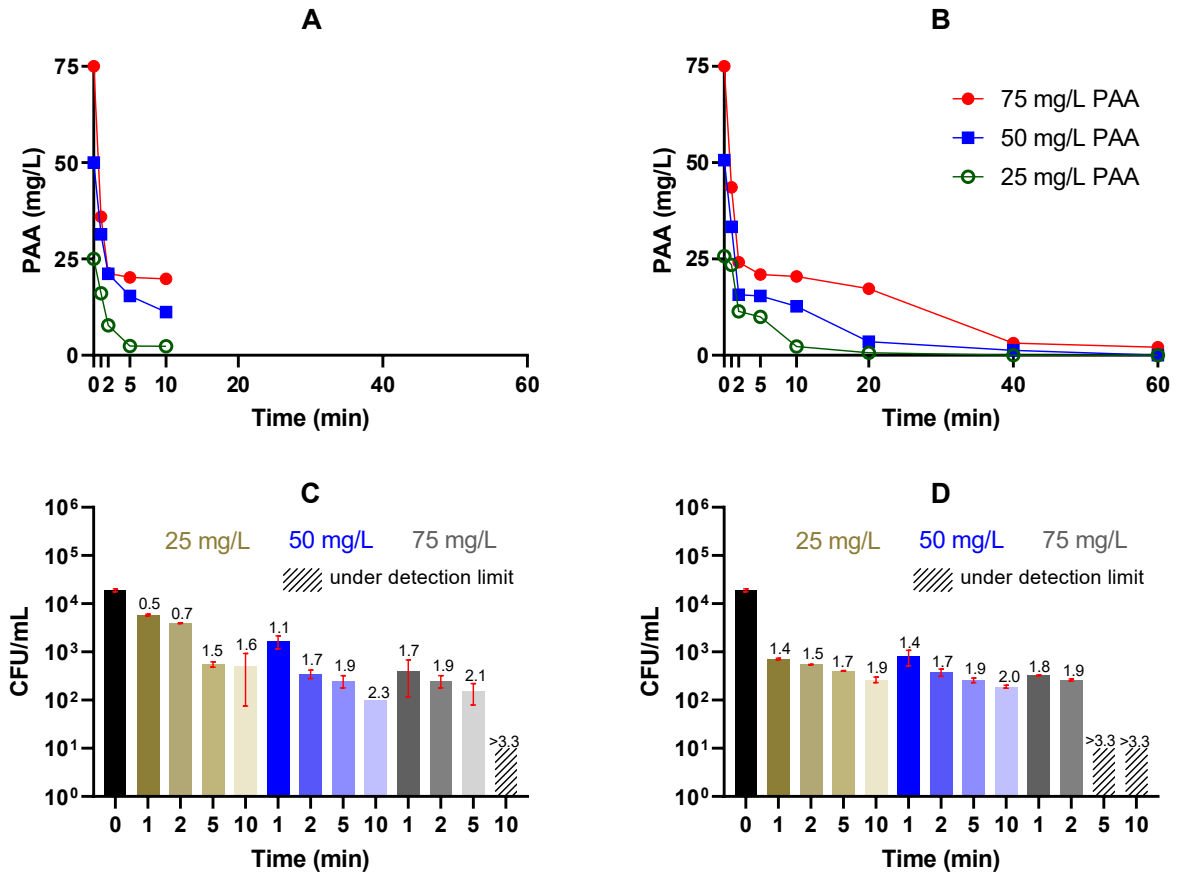

Figure S1: Concentration profiles of PAA in raw municipal wastewater from SK forsyning in the pilot-scale experiment (A), and from the batch experiment (B). The removal of ciprofloxacin-resistant bacteria in the raw municipal wastewater from SK forsyning after disinfection using different PAA concentrations in the pilot-scale experiment (C) and from the batch experiment (D). The logarithm removal of ciprofloxacin-resistant bacteria is indicated above each bar in the graph. The range of the duplicate analysis is indicated by T-bars.

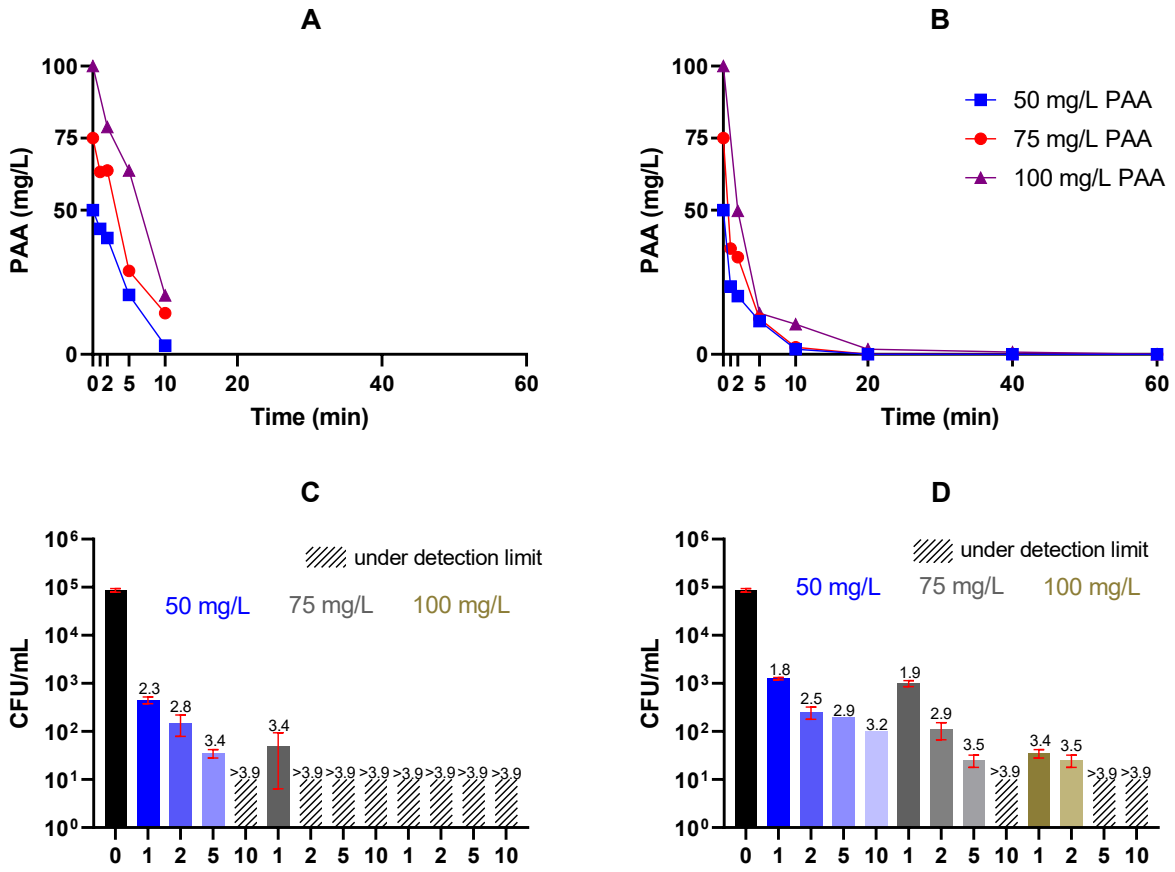

Figure S2: Concentration profiles of PAA in raw wastewater from Slagelse hospital in the pilot-scale experiment (A), and from the batch experiment (B). The removal of ciprofloxacin-resistant bacteria in the raw wastewater from Slagelse hospital after disinfection using different PAA concentrations in the pilot-scale experiment (C) and from the batch experiment (D). The logarithm removal of ciprofloxacin-resistant bacteria is indicated above each bar in the graph. The range of the duplicate analysis is indicated by T-bars.

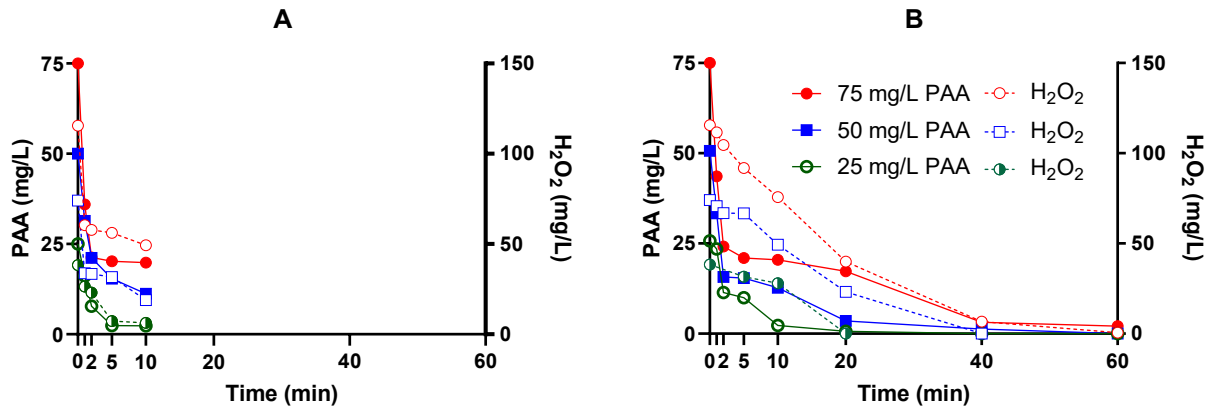

Figure S3: Concentration profile of PAA and hydrogen peroxide (H<sub>2</sub>O<sub>2</sub>) in the wastewater from SK forsyning in the second pilot experiment (A) and batch experiment (B).

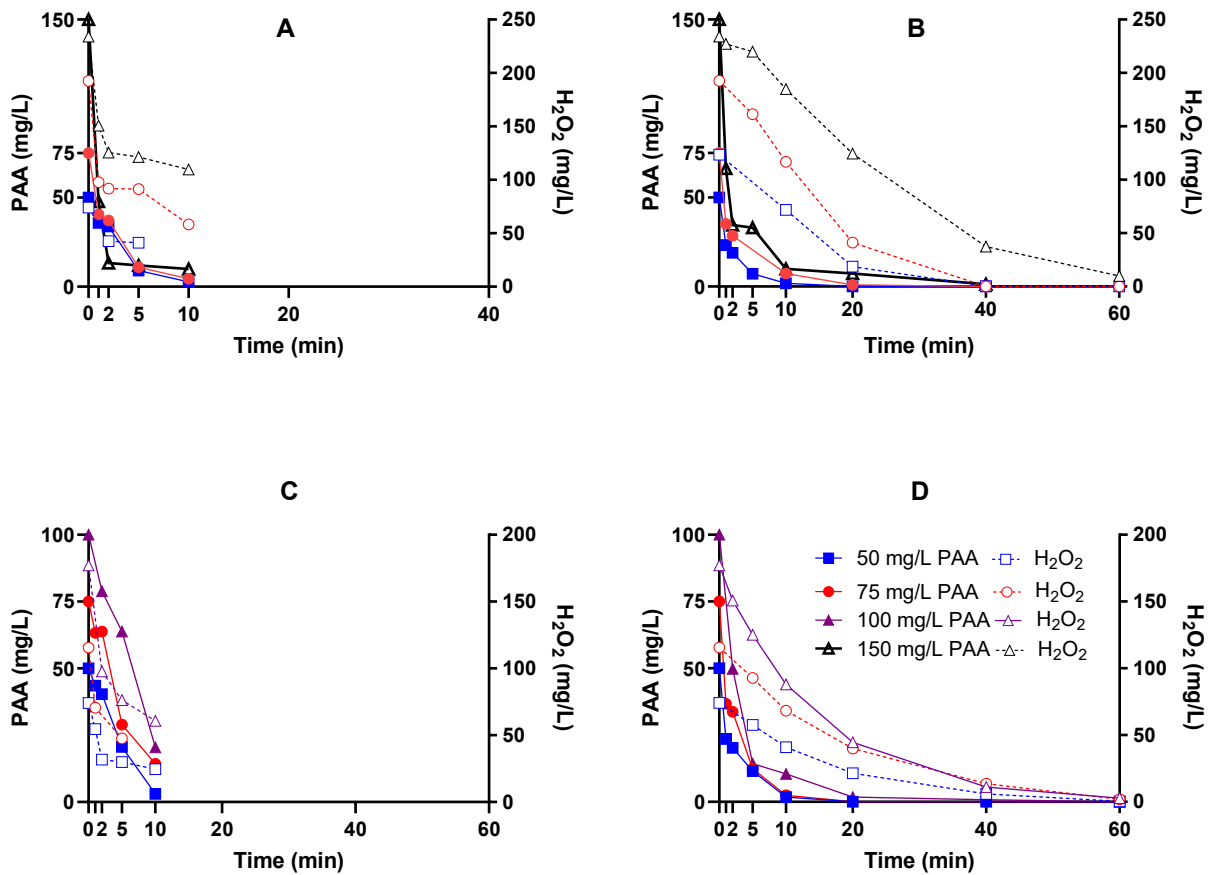

Figure S4: Concentration profile of PAA and H<sub>2</sub>O<sub>2</sub> in the wastewater from Slagelse Hospital in the first and second pilot experiment (A and C) and batch experiments (B and D).
